# Supplementary material for: Efficacy of CAR-T immunotherapy in MET overexpressing tumors not eligible for anti-MET targeted therapy
Source: PubMed Central journal article supplement (PMC9585715; doi:10.1186/s13046-022-02479-y), 2022-10-21
Supplement: 13046_2022_2479_MOESM3_ESM.pdf [file 13046_2022_2479_MOESM3_ESM.pdf]

MET gene amplification in different cell lines and primary cells derived from human tumors of different origin

| Cell line  | Tumor origin | Fold Amplification                        |
|------------|--------------|-------------------------------------------|
| A549       | Lung         | 1 <sup>#</sup> ± 0.06                     |
| EBC-1      | Lung         | 11.9 *                                    |
| GTL-16     | Stomach      | 10.42 <sup>#</sup> ± 0.69                 |
| Hs746T     | Stomach      | 17.9*                                     |
| NCI-H1993  | Lung         | 7.8*                                      |
| NCI-H226   | Lung         | 1.13 <sup>#</sup> ± 0.07                  |
| NCI-H441   | Lung         | 2.37 <sup>#</sup> ± 0.15                  |
| Caki-I     | Kidney       | 2.14 <sup>#</sup> ± 0.04                  |
| GTR-164    | Stomach      | 0.96 <sup>^</sup> ± 0.13                  |
| GTR-498    | Stomach      | 1.4 <sup>^</sup> ± 0.12                   |
| GTR-210    | Stomach      | 1.13 <sup>^</sup> ± 0.41                  |
| L1.13      | CUP          | 19.8 <sup>§</sup>                         |
| GTL-16_Res | Stomach      | 2-3 folds higher than GTL-16 <sup>@</sup> |

# Fold change in MET gene copy number with respect to the diploid cell line A549, determined by real-time qPCR.

<sup>^</sup> Fold change in MET gene copy number with respect to the diploid cell line 293T, determined by real-time qPCR.

\*Data from Pennacchietti et al., Can Res 2014; PMID: 25217525

<sup>§</sup> Data from Virzi et al. PNAS 2016; PMID: 30224486

<sup>@</sup>Data from Cepero et al., Cancer Res 2010; PMID: 20841479
